1           Antifungal effects of alantolactone on *Candida albicans*: an *in vitro* study

2           Xin Liu<sup>1</sup>, Lili Zhong<sup>2</sup>, Zhiming Ma<sup>3</sup>, Yujie Sui<sup>2</sup>, Jia'nan Xie<sup>1</sup>, Tonghui Ma<sup>4</sup> and Longfei Yang<sup>2,\*</sup>

3           1. *Eye Center, The Second Hospital of Jilin University, Changchun 130024, China*

4           2. *Jilin Provincial Key Laboratory on Molecular and Chemical Genetics, The Second Hospital of*  
5           *Jilin University, Changchun 130041, China*

6           3. *Department of Gastrointestinal Nutrition and Hernia Surgery, The Second Hospital of Jilin*  
7           *University, Changchun 130041, China*

8           4. *School of medicine and Holistic Integrative Medicine, Nanjing University of Traditional Chinese*  
9           *Medicine, Nanjing 210023, China*

10          \*, *corresponding author, yanglongfei@jlu.edu.cn*

11          **Abstract:**

12           The human fungal pathogen *Candida albicans* can cause many kinds of infections, including  
13           biofilm infections on medical devices, while the available antifungal drugs are limited to only a few. In  
14           this study, alantolactone (Ala) demonstrated antifungal activities against *C. albicans*, as well as other  
15           *Candida* species, with a MIC of 72 µg/mL. Ala could also inhibit the adhesion, yeast-to-hyphal  
16           transition, biofilm formation and development of *C. albicans*. The exopolysaccharide of biofilm matrix  
17           and extracellular phospholipase production could also be reduced by Ala treatment. Ala could increase  
18           permeability of *C. albicans* cell membrane and ROS contribute to the antifungal activity of Ala.  
19           Overall, the present study suggests that Ala may provide a promising candidate for developing  
20           antifungal drugs against *C. albicans* infections.

21          **Keywords:** *Candida albicans*, alantolactone, antifungal, virulence factor, biofilm, reactive oxygen  
22          species (ROS)

23          **Introduction**

24           An important threat to human health is fungal infections, among which infections caused by *C.*  
25           *albicans* are one of the most common (Brown et al., 2012; Perlin et al., 2017). Although opportunistic,  
26           this fungus could infect most organs of mammals with compromised immunity, causing oropharyngeal  
27           and esophageal candidiasis, and vaginitis (Mayer et al., 2013). In the clinical context, *C. albicans* can  
28           cause life-endangering candidemia and dwell on medical devices, such as catheters, leading to the  
29           formation of drug-resistant biofilms, where the exopolysaccharide (EPS) of extracellular matrix, the  
30           increased cell density, overexpression of drug targets, upregulation of drug efflux pumps and the  
31           presence of persister cells, contributes to the antifungal resistance (Fox and Nobile, 2014; Liu et al.,  
32           2017; Wall et al., 2019). The calcitrant *C. albicans* biofilms, along with the drug resistance and the  
33           undesired side effects of the handful of currently available antifungal drugs, call for the development of  
34           new antifungal agents (Liu et al., 2017; Perlin et al., 2017).

35           Natural products, especially those from traditional medicines, are promising candidates for antifungal  
36           therapies (Liu et al., 2017). Alantolactone (Ala), the major active sesquiterpene lactone component of  
37           *Inula helenium*, is a pleiotropic molecule showing anti-proliferative activities against various kinds of  
38           tumors, such as hepatocarcinoma (Khan et al., 2013), leukemia (Yang et al., 2013), lung  
39           adenocarcinoma (Zong et al., 2011; Maryam et al., 2017), and glioblastoma (Khan et al., 2012). Other  
40           pharmacological activities include neuroprotective (Wang et al., 2018), antiviral (Rezeng et al., 2015),  
41           and anti-inflammatory (Kim et al., 2017), as well as antibacterial activities against *Mycobacterium*  
42           *tuberculosis* and *Staphylococcus aureus* (Cantrell et al., 1999; Stojanovic-Radic et al., 2012).

43           In addition, Ala has also demonstrated fungistatic activity against *Fusarium solani*, *in vitro*, a fungal  
44           pathogen for plants and human, at concentrations above 100 µg/mL (Wahab et al., 1979). However, the

45 antifungal activities of Ala against *C. albicans*, has never been explored. Therefore, this study was  
46 conducted to explore the activity of Ala against *C. albicans*, as well as the underlying mechanisms.

#### 47 **Materials and methods**

48 In this study, the widely-used strain *C. albicans* SC5314 was selected for its capacity to form biofilms.  
49 Several other *Candida* species, namely *C. albicans* ATCC10231, *Candida glabrata* ATCC2001,  
50 *Candida krusei* ATCC6258, and *Candida tropicalis* ATCC7349 were also used to evaluate the  
51 antifungal activity of Ala. All these strains were bought from CGMCC and grown on YPD (yeast  
52 extract-peptone-dextrose) agar. Before each test, fungal cells were propagated in YPD medium at 28°C  
53 overnight with a rotation of 150 rpm.

54 Ala, Amphotericin B (AmB), fluconazole and caspofungin acetate (CAS) were bought from Solarbio,  
55 2,3-bis(2-methoxy-4-nitro-5-sulfohenyl)-2H-tetrazolium-5- carboxanilide (XTT), Calcofluor White  
56 (CFW), N-Acetyl-glucosamine (GlcNAc), N-acetyl-cysteine (NAC), propidium iodide (PI) and  
57 2',7'-Dichlorodihydrofluorescein diacetate (DCFH-DA) were bought from Sigma Aldrich (Shanghai).  
58 Ala and antifungal drugs were dissolved in DMSO to get stock solutions of 20 mM.

#### 59 **Antifungal susceptibility tests**

60 The antifungal susceptibility of Ala was assessed in RPMI-1640 medium through micro-dilutions  
61 following the guidelines of CLSI-M27-A3, with little modifications (Yang et al., 2018c). The  
62 concentration at which no fungal growth was observed was defined as minimum inhibitory  
63 concentration (MIC). After MIC detection, entire cultures in each well containing higher concentrations  
64 of Ala than MIC were plated on YPD agars and incubated for 2 days. The lowest concentration at  
65 which no fungal colony grown on YPD agars was defined as minimum fungicidal concentration  
66 (MFC).

#### 67 **Adhesion assay**

68 This assay was performed to assay the influence of Ala on the adhesion of *C. albicans* to polystyrene  
69 surfaces of 96-well plates (Li et al., 2015). 100 µL of *C. albicans* suspension ( $10^6$  cells/mL in 1640  
70 medium) was added in each well and after treatment with different concentrations of Ala for 90 minutes  
71 and PBS washing, the viability of fungal cells left in each well was determined by XTT assay to  
72 calculate the percentage of adherent cells.

#### 73 **Growth rate determination**

74 To assess the growth of *C. albicans* in the presence of Ala, overnight grown cultures were subcultured  
75 into YPD medium at a density of  $10^6$  cells/mL, and incubated with 18, 36 and 72 µg/mL of Ala for 24 h  
76 at 37 °C, 140 rpm. 100 µL from such culture was transferred into 96-well plates for OD<sub>600</sub>  
77 determination at intervals of two hours. These assays were performed in triplicate and repeated for  
78 three times.

#### 79 **Yeast-to-hyphal transition**

80 The influence of Ala on morphological transition of *C. albicans* was assessed in four hyphal-inducing  
81 media, RPMI-1640, Spider medium, GlcNAc medium and 10% FBS SD medium. 0, 18, 36 and 72  
82 µg/mL of Ala were added into *C. albicans* cell suspensions ( $10^6$  cells/mL) in each medium and  
83 incubated for 4 hours at 37°C. Then, cellular morphologies were recorded by inverted microscope  
84 (IX71).

#### 85 **Biofilm assay**

86 *C. albicans* cell suspension ( $10^6$  cells/mL, in 1640 medium) was added into 96-well plates and allowed  
87 to grow statically to form biofilms in the presence of different concentrations of Ala for 24 h. After  
88 washing with PBS, the viability of cells in each well was determined by XTT assay (Siles et al., 2013).

89 To assess the effects of Ala on biofilm development, mature biofilms formed without drugs were  
90 washed with PBS, and treated with Ala (in fresh 1640 medium) for another 24 h. Then, XTT reduction  
91 assay were performed.

#### 92 **CLSM analysis**

93 Biofilms, formed under exposure to different concentrations of Ala, were stained with CFW (50  
94  $\mu\text{g}/\text{mL}$ ), and subjected to confocal laser scanning microscope (CLSM) to observe the structures of  
95 biofilms. Pictures acquired through xyz mode of scanning were reconstructed with Imaris 7.02  
96 software.

#### 97 **EPS detection**

98 The EPS of preformed biofilms was determined by colorimetry as described by others (Nithyanand  
99 et al., 2015). Preformed *C. albicans* biofilms in 24-well plates were treated by different concentration of  
100 Ala for 24 h and washed with 0.9% NaCl solution. Then, 200  $\mu\text{L}$  0.9% NaCl, 200  $\mu\text{L}$  5% phenol and 2  
101 mL 0.2% hydrazine sulfate (dissolved in sulfuric acid) were added into each well and plates were kept  
102 in dark for 1 h. The absorbance of reaction product in each well was detected at 490 nm by a  
103 multifunctional microplate reader (VarioSkan, Thermo).

#### 104 **Extracellular phospholipase assay**

105 The production of extracellular phospholipase was evaluated by egg yolk emulsion agar (Padmavathi et  
106 al., 2015). 1  $\mu\text{L}$  of *C. albicans* cell suspension ( $10^6$  cells/mL) was added on agars supplemented with  
107 different concentrations of Ala, followed by incubation at 37°C for 4 days. The diameter of colony ( $d_1$ ),  
108 as well as that of colony and precipitation zone ( $d_2$ ) was measured. Pz ( $d_1/d_2$ ) was used to assess the  
109 production of enzyme, while a bigger Pz stands for weak enzymatic production.

#### 110 **PI influx**

111 *C. albicans* cells ( $10^6$  cells/mL in 1640 medium) were incubated with different concentrations of Ala at  
112 37°C for 4 h before cells were stained with 10  $\mu\text{M}$  PI, a fluorescent dye that gains access into cells  
113 when cell membrane was damaged. After incubation in dark for 10 minutes, cells were subjected to  
114 flow cytometry (FCM) (Beckman Coulter, EPICS XL-MCL, US) to quantify the cells stained by PI.

#### 115 **ROS detection**

116 To determine the ROS production induced by Ala in *C. albicans* cells, DCFH-DA staining (10  $\mu\text{M}$ , 30  
117 minutes) were performed after fungal cells ( $10^6$  cells/mL in 1640 medium) were treated with different  
118 concentrations of Ala for 4 h at 28°C, 150 rpm. Then, fungal cells were washed with PBS and subjected  
119 to FCM for quantitative analysis.

#### 120 **NAC rescue assay**

121 To further test the effects of oxidative stress caused by Ala on the biofilm formation, N-acetyl-cysteine  
122 (NAC) rescue assay was performed. Under biofilm formation conditions, fungal cells in 1640 medium  
123 supplemented with or without 5 mM NAC was challenged with 32  $\mu\text{g}/\text{mL}$  of Ala for 24 h. Then, the  
124 morphologies of biofilms were photographed before XTT assay were performed to assay the viability  
125 of cells in biofilms (Yang et al., 2018a).

#### 126 **Checkerboard assay with antifungal drugs**

127 To elucidate the potential interactions between Ala and antifungal drugs (AmB, fluconazole and CAS),  
128 checkerboard assays were performed (Haque et al., 2016). The interaction of combination was  
129 considered as synergistic when FICI is  $\leq 5$ , additive when FICI is  $>0.5$  and  $\leq 1$ , indifferent when FICI  
130 is  $> 1$  and  $\leq 4$ , and antagonist when FICI is  $> 4$ .

#### 131 **Statistical analysis**

132 Data (expressed as mean + SD, from at least three independent assays) were analyzed with GraphPad

133 Prism 6.02 (GraphPad Software, USA) and statistical significance was determined by Student *t*-test,  
134 with \* indicating  $P < 0.05$ .

### 135 **Results**

136 From the results of CLSI microdilution assays, as shown in Table 1, the MIC of Ala against *C. albicans*  
137 SC5314 was 72  $\mu\text{g/mL}$ , while the MFC of also 72  $\mu\text{g/mL}$ , yielding an MFC/MIC ratio of 1, which  
138 indicated a fungicidal activity of Ala. The antifungal activities of Ala against other *Candida* species  
139 were similar to that against *C. albicans* SC5314. Therefore, the widely-used standard strain *C. albicans*  
140 SC5314 was selected for further assays in this study.

141 Table 1. Antifungal susceptibility of Ala against *Candida* species.

| Strains                       | MIC ( $\mu\text{g/mL}$ ) | MFC ( $\mu\text{g/mL}$ ) |
|-------------------------------|--------------------------|--------------------------|
| <i>C. albicans</i> SC5314     | 72                       | 72                       |
| <i>C. albicans</i> ATCC10231  | 72                       | 144                      |
| <i>C. krusei</i> ATCC6258     | 18                       | 36                       |
| <i>C. tropicalis</i> ATCC7349 | 72                       | 72                       |
| <i>C. glabrata</i> ATCC2001   | 36                       | 72                       |

142

143 Hyphal formation is closely associated with biofilm formation and escape from immune surveillance.  
144 As shown in Figure 1, with the increase of Ala concentration, the hyphal growth of *C. albicans* in all  
145 four kinds of media was inhibited gradually. The degree of inhibition was a little different, with  
146 inhibition in Spider medium be strongest where Ala at 36  $\mu\text{g/mL}$  could keep cells in yeast type.  
147 Although hyphal induction in medium containing FBS could be suppressed by 72  $\mu\text{g/mL}$  of Ala, the  
148 cells in yeast type were more than those in other media, indicating the strong induction of FBS and the  
149 weak inhibition of Ala in this FBS-containing medium.

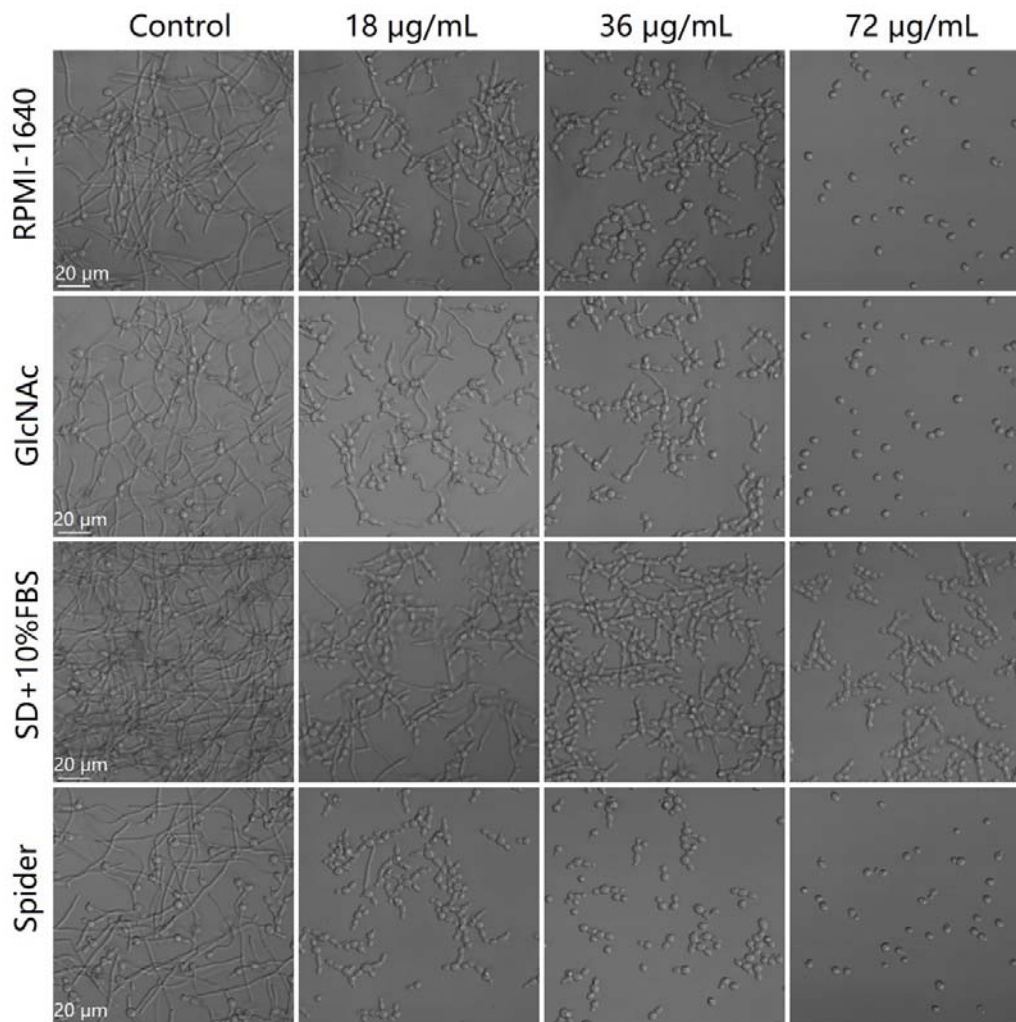

150

151 Figure 1. Hyphal induction in four kinds of media, namely RPMI-1640, GlcNAc, SD+10% FBS  
152 and Spider medium, was impeded by Ala in a concentration-dependent manner. After inoculation into  
153 each fresh medium to achieve a density of  $10^6$  cells/mL, *C. albicans* cells were incubated at 37°C for 4  
154 h, followed by microscope inspection and micrograph capture through inverted microscope (Olympus  
155 IX 71, Japan).

156

157 The widely used XTT reduction assay was performed to determine the antibiofilm activity of Ala. At  
158 concentrations below MIC, namely 9, 18, 36 and 72 µg/mL, Ala could significantly inhibit the biofilm  
159 formation of *C. albicans*, with a half maximal inhibitory concentration ( $IC_{50}$ ) of about 9 µg/mL (Figure  
160 2A). 18, 36 and 72 µg/mL of Ala could also reduce the metabolic activity of preformed biofilm by 20%,  
161 65% and 85% respectively, as compared to drug-free controls (Figure 2B). Adhesion plays important  
162 roles in biofilm formation and infections of *C. albicans*. The inhibitory effect of Ala on the adhesion of  
163 *C. albicans* cells to polystyrene surfaces was also quantified by XTT assay. As shown in Figure 2C, 18,  
164 36 and 72 µg/mL of Ala could also significantly decrease the adhesion to polystyrene surfaces, to an  
165 extent of 15%, 40% and 88%, respectively.

166 The inhibition of Ala on biofilm formation could also be confirmed by results from CLSM. Pictures of  
167 biofilms formed under treatment of Ala were recorded by CLSM and reconstructed by software to

168 visualize the 3D structures. As shown in Figure 3, increasing the Ala concentration from 0 to 72  $\mu\text{g}/\text{mL}$ ,  
169 lead to the thinner and sparser biofilms. While treatment with 72  $\mu\text{g}/\text{mL}$  of Ala can almost completely  
170 block the biofilm formation, and only yeast cells can be seen.

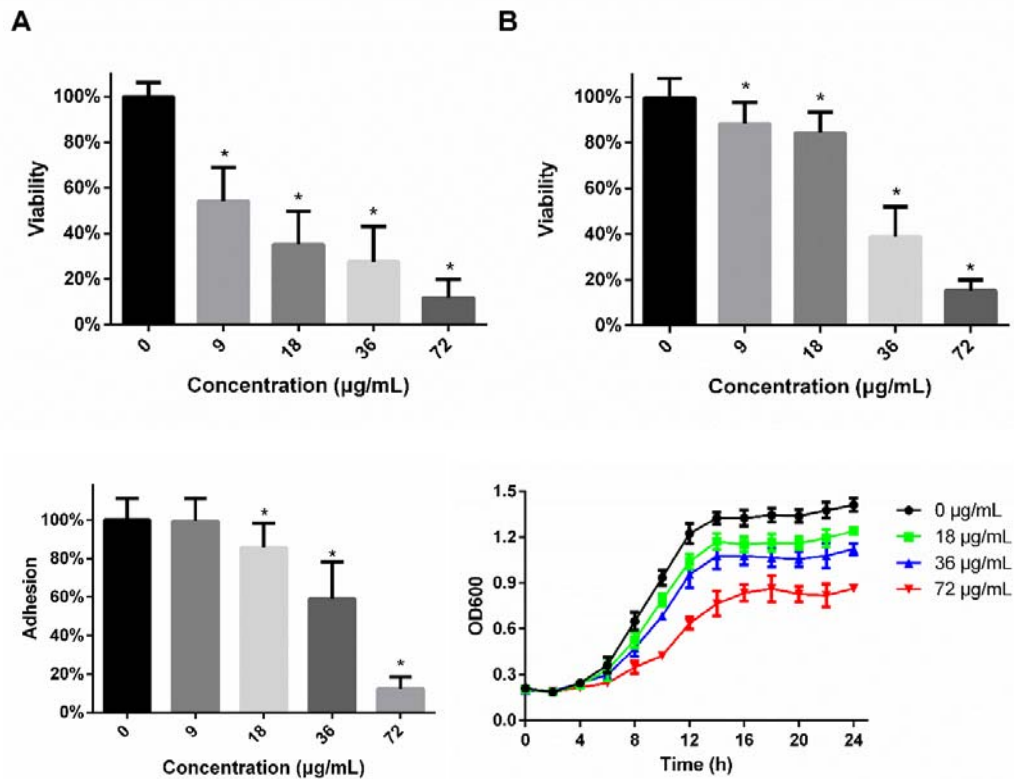

171

172

173 Figure 2. The effects of Ala on the biofilm formation and development. *C. albicans* biofilms were  
174 formed under exposure to Ala (A) or preformed biofilms were treated by Ala (B) for 24 h, followed by  
175 XTT reduction assay. (C) Ala decreased the adhesion of *C. albicans* cells to polystyrene surfaces.  
176 Adhesion to polystyrene surfaces was determined by XTT, which was used to quantify the viability of  
177 the residual cells standing 90 minutes of Ala treatment and subsequent PBS washing. \*,  $p < 0.05$ ,  
178 Ala-treated vs control. (D) 18, 36 and 72  $\mu\text{g}/\text{mL}$  of Ala did not inhibit completely the growth of *C.*  
179 *albicans*.

180



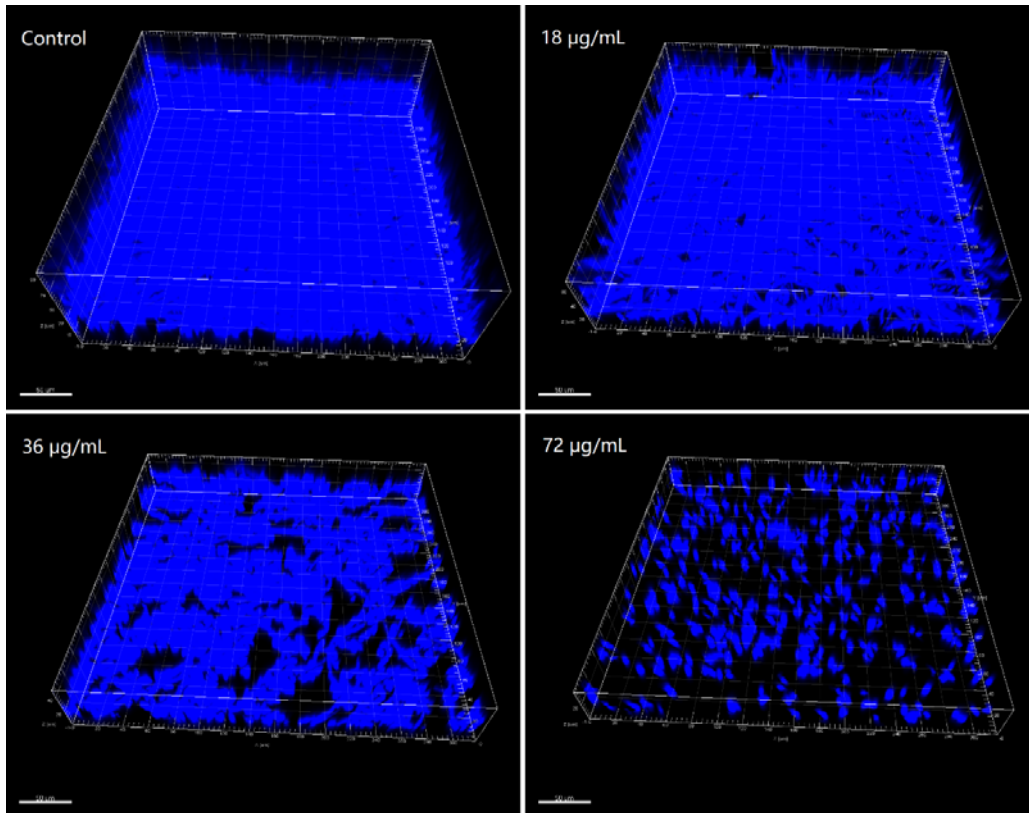

181  
182 Figure 3. Ala inhibited biofilm formation, visualized and recorded by confocal microscope. Cells  
183 in biofilms were stained with 20 µg/mL CFW before microscope analysis. Z-stacked images obtained  
184 by CLSM were re-constructed by Imaris software version 7.02.

185  
186 EPS of preformed *C. albicans* biofilm contribute to the sequestration of antifungal drugs within  
187 biofilms. So, we tested the effects of Ala on EPS production of preformed biofilms. As shown in Figure  
188 4, Ala treatment could decrease the EPS production in mature biofilms, in a concentration-dependent  
189 way. Treatment with 18, 36 and 72 µg/mL of Ala could reduce the EPS production about 15%, 30% and  
190 34%, as compared to drug-free controls.

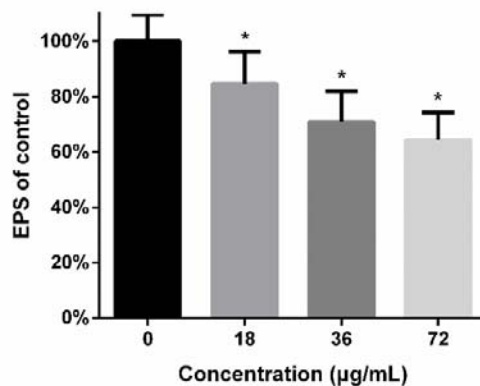

191  
192 Figure 4. Ala inhibits the EPS production of *C. albicans* biofilms. Preformed *C. albicans* biofilms  
193 were treated with different concentrations of Ala for 24 h before the determination of EPS production  
194 in biofilms through phenol-hydrazine sulfate method. \*, p<0.05 vs control.

195

196 Extracellular phospholipase of *C. albicans* contributes to its virulence in mouse models. Our results  
197 from egg yolk emulsion agar assay showed that Ala could significantly inhibit the production of  
198 extracellular phospholipase of *C. albicans* (Figure 5), although the increased extent of Pz was limited,  
199 which was considered as an indicator of phospholipase production.

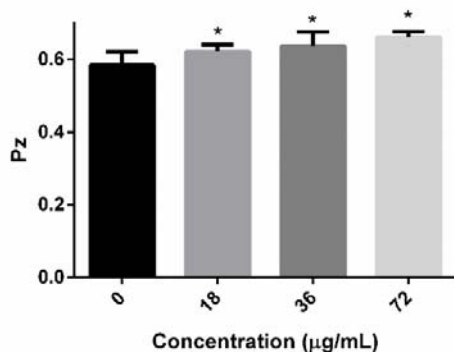

200

201 Figure 5. Ala affected the production of extracellular phospholipase in *C. albicans*. Fungal cells  
202 were added on egg yolk emulsion agars supplemented with different concentrations of Ala. After 4-day  
203 incubation at 37°C, the diameter of colony ( $d_1$ ) and that of colony plus precipitation zone ( $d_2$ ) were  
204 determined. Pz means  $d_1/d_2$ , while higher Pz indicates lower phospholipase production. \*,  $p < 0.05$ ,  
205 Ala-treated vs control

206

207 After we found the inhibitory effects of Ala on the virulence factors of *C. albicans*, we proceeded to  
208 explore the mechanisms underlying the antifungal activity of Ala. At first, the effects of Ala on the  
209 permeability of *C. albicans* plasma membrane were determined by FCM after treated cells were stained  
210 by PI. Treatment with Ala for 4 hours, could increase the membrane permeability of *C. albicans* cells,  
211 as evidenced by increased proportion of cells stained by PI (Figure 6).

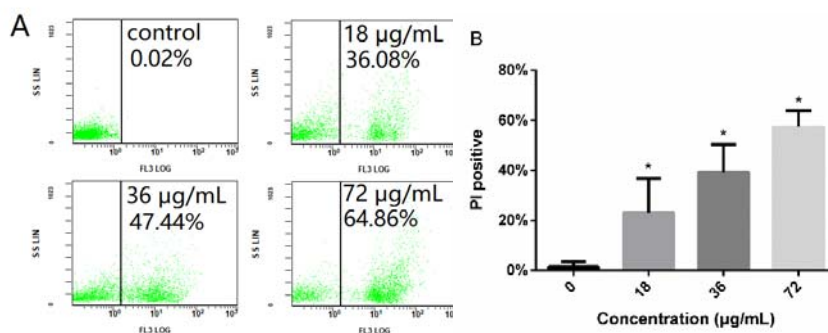

212

213 Figure 6. Ala induces permeability of plasma membrane of *C. albicans* cells. After exposure to 18,  
214 36 and 72 µg/mL Ala for 4 h, fungal cells were stained with PI (final concentration: 10 µM) for 10  
215 minutes before FCM analysis. A: representative FCM charts. B: statistical graph of PI staining. \*,  
216  $p < 0.05$ , Ala-treated vs control.

217

218 The effects of Ala on ROS production in *C. albicans* cells were evaluated through FCM. As revealed  
219 by Figure 7, treatment with Ala significantly increased endogenous ROS production. Then, we assessed  
220 the role of ROS in the antifungal activity of Ala against biofilm formation. The addition of 5 mM NAC



221 could save part of decreased viability of biofilms treated with 36  $\mu\text{g/mL}$  of Ala, despite that 5 mM  
 222 NAC alone could significantly reduce the viability of biofilms (Figure 8A). In addition, this kind of  
 223 rescue by NAC could also be confirmed by microscope observations (Figure 8B), whereas the presence  
 224 of NAC could restore the biofilm growth under the treatment of 36  $\mu\text{g/mL}$  of Ala.

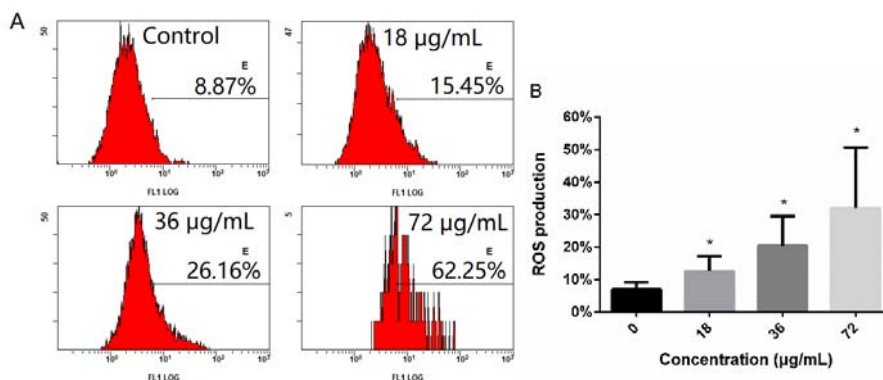

225  
 226 Figure 7. Ala increased endogenous ROS production in *C. albicans* cells. Fungal cells treated with  
 227 different concentrations of Ala for 4 h were subjected to FCM to determine the intracellular ROS  
 228 production. A: representative FCM charts. B: Statistical graph of ROS production. \*,  $p < 0.05$   
 229 Ala-treated vs control.

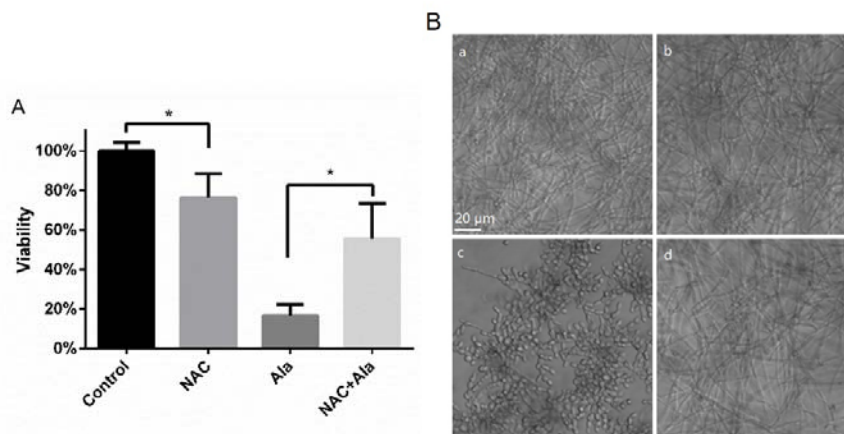

230  
 231 Figure 8. NAC could rescue the damages on biofilm viability imposed by Ala. Under  
 232 biofilm-forming conditions, fungal cells in 1640 medium alone or with 5 mM NAC were allowed  
 233 to grow 24 h in the absence or presence of 36  $\mu\text{g/mL}$  Ala. XTT reduction assay were employed  
 234 to determine the viability of each group (A) and the biofilm morphologies of each group were recorded  
 235 by microscope (B). a, control; b, 5 mM NAC; c, 36  $\mu\text{g/mL}$  Ala; d, 36  $\mu\text{g/mL}$  Ala+5 mM NAC. \*,  $p < 0.05$ ,  
 236 determined by *t*-test.

237  
 238

Table 2. Interaction of Ala with antifungal drugs

| Drug | MIC of drugs ( $\mu\text{g/mL}$ ) |          | MIC of Ala ( $\mu\text{g/mL}$ ) |          | FICI   | Interaction |
|------|-----------------------------------|----------|---------------------------------|----------|--------|-------------|
|      | Alone                             | Combined | Alone                           | Combined |        |             |
| AmB  | 0.625                             | 0.156    | 72                              | 36       | 0.75   | Additive    |
| CAS  | 0.625                             | 0.313    | 72                              | 9        | 0.6125 | Additive    |
| FLZ  | 1.25                              | 1.25     | 72                              | 72       | 2      | Indifferent |

239

240 To characterize the interactions between Ala and antifungal drugs, namely, AmB, FLZ and CAS,  
241 checkerboard assays based on microdilutions were performed. From data obtained, as shown in Table 2,  
242 the FIC of the combination of Ala and AmB was 0.75, suggesting an additive antifungal effect. In other  
243 words, Ala could potentiate the efficacy of AmB. Therefore, by adding Ala to the antifungal therapy,  
244 the dose of AmB could be decreased. This kind of additive and potentiating effect could also be seen in  
245 the combination of Ala and CAS. However, as for the combination between Ala and FLZ, the  
246 interaction was indifferent.

## 247 **Discussion**

248 *C. albicans*, one of the most notorious human fungal pathogens, causes more than 250,000 death and  
249 millions of episodes of recurrent infections every year around the world, leaving a heavy burden on  
250 public health system (da Silva Dantas et al., 2016). The pressing situation we faced, including  
251 resistance and toxicity of currently available antifungal drugs, calls for new antifungal agents,  
252 especially agents effective against fungal biofilms which are highly resistant to antifungal agents and  
253 host defense (Wong et al., 2014; Lohse et al., 2018). In this study, we for the first time, to our  
254 knowledge, demonstrated the antifungal activity of Ala against *C. albicans*, as well as its biofilms and  
255 several other *Candida* species. Although this lactone has failed to show antifungal activities against *C.*  
256 *albicans* before, that may be due to the concentrations used (40 µg/mL), which was lower than the MIC  
257 of Ala in this study (Meng et al., 2001).

258 Biofilms formed on surfaces of medical devices and mucosal tissues represent a calcitrant reservoir for  
259 persistent infections, due to the complicated structures and resistance to antifungals (Mathe and Van  
260 Dijck, 2013). Adhesion constitutes the first prerequisite for *C. albicans* biofilm formation. Thus, many  
261 antifungal agents active against *C. albicans* biofilms showed suppression on adhesion, although  
262 biofilm-inhibitory agents without effects against adhesion did exist (Holtappels et al., 2018). In this  
263 study, Ala could inhibit the adhesion of *C. albicans* to polystyrene surfaces, upon which the biofilm  
264 formation of *C. albicans* could also be inhibited by Ala. More importantly, 18-72 µg/mL of Ala (1/4~1  
265 MIC) could exert disruptive effects on preformed biofilms, which could hardly be eradicated by  
266 antifungal drug fluconazole, as well as AmB at 1 MIC (Vila et al., 2013). This makes Ala a promising  
267 antibiofilm compound, although the MIC against *C. albicans* was a little high. Despite this, many  
268 factors present in vivo, such as liquid flow, host factors and components of immune response, may  
269 influence the biofilm formation and development (Nobile et al., 2012). The in vivo efficacy of Ala may  
270 also be influenced and warrant further investigation.

271 Yeast-to-hyphal transition is closely associated with the virulence of *C. albicans*, although this  
272 transition could be decoupled from pathogenicity (Noble et al., 2010). Multiple physical properties of *C.*  
273 *albicans* hyphae can be employed to promote active fungal invasion to epithelial tissues, especially  
274 those terminally differentiated (Richardson et al., 2019). Hyphae of *C. albicans* could produce  
275 candidalysin, a cytolytic peptide, to damage mucosal tissues, and hyphae can also facilitate the escape  
276 from macrophages and the formation of biofilms (Moyes et al., 2016; Noble et al., 2017). In the four  
277 kinds of hyphal-inducing media, Ala could inhibit the morphological transition, albeit that the degree of  
278 inhibition differed. The reason may be that the different signaling pathways were activated in those  
279 four kinds of media, among which the FBS-containing medium was the most potent inducer of hyphae  
280 (Sudbery, 2011). Meanwhile, even blocked in yeast state in the presence of 72 µg/mL Ala, *C. albicans*  
281 cells growing in FBS-containing SD medium outnumbered those growing in the other media. This is  
282 consistent with the fact that the presence of FBS could increase the MIC of CAS (Shields et al., 2011).  
283 Antifungal resistance of *C. albicans* biofilms may, at least partly, stem from the presence of EPS in

284 biofilms, which could sequester the antifungal drugs (Taff et al., 2013). The complex physical and  
285 biological properties of EPS may warrant multitargeted or combination therapies (Karygianni et al.,  
286 2020). Ala could decrease the EPS of preformed biofilms, similar to antifungal agents active against  
287 biofilms published by others (Nithyanand et al., 2015). When used in combination with other  
288 antifungal drugs, Ala might facilitate the access of drugs to fungal cells within biofilms, thus posing a  
289 synergistic or additive effect on mature biofilms.

290 Extracellular phospholipase secreted by *C. albicans* contributes to the invasion and infection through  
291 degrading phospholipids in host cell membrane, while mutants of phospholipase showed less  
292 infectivity in experimental animal models of infection (Mayer et al., 2013; Singh et al., 2018). Many  
293 antifungal agents, such as fluconazole, dracorhodin perchlorate and 2, 4-di-tert-butylpheno, have  
294 shown inhibitory effects on phospholipase production (Padmavathi et al., 2015; Singh et al., 2018;  
295 Yang et al., 2018c). Similarly, in this study, the production of *C. albicans* extracellular phospholipase in  
296 the presence of Ala was less, in comparison to drug-free controls. Taken together, Ala could inhibit the  
297 growth and virulence factors of *C. albicans*.

298 Ala could significantly increase the portion of PI positive cells, suggesting that Ala permeabilized the  
299 plasma membrane. The increased permeability of *C. albicans* cell membrane can also be induced other  
300 antifungal agents, such as dioscin and hibicuslide C (Hwang et al., 2013; Yang et al., 2018b).

301 Among the mechanisms underlying antifungal agents and macrophages, ROS induction plays  
302 important roles (Erwig and Gow, 2016; Thangamani et al., 2017; Ries et al., 2019). Since Ala could  
303 induce ROS production in various kinds of tumor cells (Khan et al., 2012; Khan et al., 2013), so we  
304 speculated that ROS may be closely associated with the antifungal activity of Ala. As expected, Ala  
305 could significantly increase the production of ROS, consistent with our previous reports on Ala and  
306 other ROS-inducing antifungal agents (Khan et al., 2012; Khan et al., 2013; Thangamani et al., 2017;  
307 Yang et al., 2018a; Ries et al., 2019).

308 The famous antioxidant NAC showed inhibition on *C. albicans* growth and disruptive effects on  
309 preformed biofilms, although the effective concentrations were high, at the level of mg/mL (Venkatesh  
310 et al., 2009; Aslam and Darouiche, 2011). In our study, although 5 mM NAC (approximately 0.8  
311 mg/mL) alone can inhibit the viability of *C. albicans* biofilms, which was consistent with its fungistatic  
312 property at high concentrations in previous researches by others (Aslam and Darouiche, 2011),  
313 supplement with 5 mM NAC could obviously rescue the decrease in viability caused by Ala treatment.  
314 This, along with the FCM results, confirmed that ROS did contribute to the antifungal activity of Ala.

315 Combination therapy has been considered to extend the efficacy of current antifungal drugs and  
316 prevent/slow the emergence of drug resistance (Cui et al., 2015; Wright, 2016; Fisher et al., 2018). For  
317 example, the combinational use of fluconazole, flucytosine and AmB has been employed to treat  
318 cryptococcal meningitis in patients with HIV infections (Fisher et al., 2018)., the combination of Ala  
319 and AmB or CAS could produce an additive effect. This suggests that when used in combination, Ala  
320 might reduce the dose of AmB and CAS required to treat *C. albicans* infections.

## 321 **Conclusion**

322 In conclusion, our current study reveals the antifungal effects of Ala on *C. albicans* for the first time.  
323 The virulence factors of this pathogenic fungus, including morphological transition, adhesion, biofilm  
324 formation, production of extracellular phospholipase, could be inhibited by Ala. Of note, the metabolic  
325 activity and EPS production of preformed biofilm also can be suppressed by this natural product. The  
326 antifungal effects of Ala against *C. albicans* may involve increased cell membrane permeability and  
327 ROS production.

328

329 **Funding**

330 This study was supported by China Natural Science Foundation [No.82000920].

331 **Conflict of interest**

332 The authors declare that they have no competing interest.

333 **Availability of data and material**

334 The all data could be obtained from the corresponding author.

335 **Authors' contributions**

336 Conception and design: XL, TM and LY; experiments: XL, LZ and LY, data analysis: XL, ZM and  
337 LY, review and comment: JX, ZM, TM and YS; All authors read and approved the manuscript.

338 The authors declare that all data were generated in-house and that no paper mill was used.

339

340 **Reference:**

341 Aslam SDarouiche RO. Role of antibiofilm-antimicrobial agents in controlling device-related  
342 infections. *Int J Artif Organs* 2011;34(9):752-8.

343 Brown GD, Denning DW, Gow NA, Levitz SM, Netea MG, White TC. Hidden killers: human fungal  
344 infections. *Sci Transl Med* 2012;4(165):165rv13.

345 Cantrell CL, Abate L, Fronczek FR, Franzblau SG, Quijano L, Fischer NH. Antimycobacterial  
346 eudesmanolides from *Inula helenium* and *Rudbeckia subtomentosa*. *Planta Med* 1999;65(4):351-5.

347 Cui J, Ren B, Tong Y, Dai H, Zhang L. Synergistic combinations of antifungals and anti-virulence  
348 agents to fight against *Candida albicans*. *Virulence* 2015;6(4):362-71.

349 da Silva Dantas A, Lee KK, Raziunaite I, Schaefer K, Wagener J, Yadav B, Gow NA. Cell biology of  
350 *Candida albicans*-host interactions. *Curr Opin Microbiol* 2016;34:111-118.

351 Erwig LP, Gow NA. Interactions of fungal pathogens with phagocytes. *Nat Rev Microbiol*  
352 2016;14(3):163-76.

353 Fisher MC, Hawkins NJ, Sanglard D, Gurr SJ. Worldwide emergence of resistance to antifungal drugs  
354 challenges human health and food security. *Science* 2018;360(6390):739-742.

355 Fox EPNobile CJ. A sticky situation: Untangling the transcriptional network controlling biofilm  
356 development in *Candida albicans*. *Transcription* 2014;3(6):315-322.

357 Haque F, Alfatah M, Ganesan K, Bhattacharyya MS. Inhibitory Effect of Sophorolipid on *Candida*  
358 *albicans* Biofilm Formation and Hyphal Growth. *Sci Rep* 2016;6:23575.

359 Holtappels M, Swinnen E, De Groef L, Wuyts J, Moons L, Lagrou K, Van Dijck P, Kucharikova S.  
360 Antifungal Activity of Oleylphosphocholine on In Vitro and In Vivo *Candida albicans* Biofilms.  
361 *Antimicrob Agents Chemother* 2018;62(1).

362 Hwang JH, Jin Q, Woo ER, Lee DG. Antifungal property of hibicuslide C and its membrane-active  
363 mechanism in *Candida albicans*. *Biochimie* 2013;95(10):1917-22.

364 Karygianni L, Ren Z, Koo H, Thurnheer T. Biofilm Matrixome: Extracellular Components in  
365 Structured Microbial Communities. *Trends Microbiol* 2020;28(8):668-681.

366 Khan M, Yi F, Rasul A, Li T, Wang N, Gao H, Gao R, Ma T. Alantolactone induces apoptosis in  
367 glioblastoma cells via GSH depletion, ROS generation, and mitochondrial dysfunction. *IUBMB Life*  
368 2012;64(9):783-794.

369 Khan M, Li T, Ahmad Khan MK, Rasul A, Nawaz F, Sun M, Zheng Y, Ma T. Alantolactone induces  
370 apoptosis in HepG2 cells through GSH depletion, inhibition of STAT3 activation, and mitochondrial  
371 dysfunction. *Biomed Res Int* 2013;2013:719858.

- 372 Kim M, Song K, Kim YS. Alantolactone Improves Prolonged Exposure of Interleukin-6-Induced  
373 Skeletal Muscle Inflammation Associated Glucose Intolerance and Insulin Resistance. *Front Pharmacol*  
374 2017;8:405.
- 375 Li Y, Chang W, Zhang M, Ying Z, Lou H. Natural product solasodine-3-O-beta-D-glucopyranoside  
376 inhibits the virulence factors of *Candida albicans*. *FEMS Yeast Res* 2015;15(6).
- 377 Liu X, Ma Z, Zhang J, Yang L. Antifungal Compounds against *Candida* Infections from Traditional  
378 Chinese Medicine. *Biomed Res Int* 2017;2017:4614183.
- 379 Lohse MB, Gulati M, Johnson AD, Nobile CJ. Development and regulation of single- and  
380 multi-species *Candida albicans* biofilms. *Nat Rev Microbiol* 2018;16(1):19-31.
- 381 Maryam A, Mehmood T, Zhang H, Li Y, Khan M, Ma T. Alantolactone induces apoptosis, promotes  
382 STAT3 glutathionylation and enhances chemosensitivity of A549 lung adenocarcinoma cells to  
383 doxorubicin via oxidative stress. *Scientific Reports* 2017;7(1).
- 384 Mathe LVan Dijck P. Recent insights into *Candida albicans* biofilm resistance mechanisms. *Curr Genet*  
385 2013;59(4):251-64.
- 386 Mayer FL, Wilson D, Hube B. *Candida albicans* pathogenicity mechanisms. *Virulence*  
387 2013;4(2):119-28.
- 388 Meng JC, Hu YF, Chen JH, Tan RX. Antifungal highly oxygenated guaianolides and other constituents  
389 from *Ajania fruticulosa*. *Phytochemistry* 2001;58(7):1141-5.
- 390 Moyes DL, Wilson D, Richardson JP, Mogavero S, Tang SX, Wernecke J, Hofs S, Gratacap RL,  
391 Robbins J, Runglall M, Murciano C, Blagojevic M, Thavaraj S, Forster TM, Hebecker B, Kasper L,  
392 Vizcay G, Iancu SI, Kichik N, Hader A, Kurzai O, Luo T, Kruger T, Kniemeyer O, Cota E, Bader O,  
393 Wheeler RT, Gutschmann T, Hube B, Naglik JR. Candidalysin is a fungal peptide toxin critical for  
394 mucosal infection. *Nature* 2016.
- 395 Nithyanand P, Beema Shafreen RM, Muthamil S, Karutha Pandian S. Usnic acid inhibits biofilm  
396 formation and virulent morphological traits of *Candida albicans*. *Microbiol Res* 2015;179:20-8.
- 397 Nobile CJ, Fox EP, Nett JE, Sorrells TR, Mitrovich QM, Hernday AD, Tuch BB, Andes DR, Johnson  
398 AD. A recently evolved transcriptional network controls biofilm development in *Candida albicans*. *Cell*  
399 2012;148(1-2):126-38.
- 400 Noble SM, Gianetti BA, Witchley JN. *Candida albicans* cell-type switching and functional plasticity in  
401 the mammalian host. *Nat Rev Microbiol* 2017;15(2):96-108.
- 402 Noble SM, French S, Kohn LA, Chen V, Johnson AD. Systematic screens of a *Candida albicans*  
403 homozygous deletion library decouple morphogenetic switching and pathogenicity. *Nat Genet*  
404 2010;42(7):590-8.
- 405 Padmavathi AR, Bakkiyaraj D, Thajuddin N, Pandian SK. Effect of 2, 4-di-tert-butylphenol on growth  
406 and biofilm formation by an opportunistic fungus *Candida albicans*. *Biofouling* 2015;31(7):565-74.
- 407 Perlin DS, Rautemaa-Richardson R, Alastruey-Izquierdo A. The global problem of antifungal  
408 resistance: prevalence, mechanisms, and management. *Lancet Infect Dis* 2017;17(12):e383-e392.
- 409 Rezeng C, Yuan D, Long J, Suonan D, Yang F, Li W, Tong L, Jiumei P. Alantolactone exhibited  
410 anti-herpes simplex virus 1 (HSV-1) action in vitro. *Biosci Trends* 2015;9(6):420-2.
- 411 Richardson JP, Moyes DL, Ho J, Naglik JR. *Candida* innate immunity at the mucosa. *Semin Cell Dev*  
412 *Biol* 2019;89:58-70.
- 413 Ries F, Alflen A, Lopez PA, Beckert H, Theobald M, Schild H, Teschner D, Radsak MP. Antifungal  
414 Drugs Influence Neutrophil Effector Functions. *Antimicrob Agents Chemother* 2019.
- 415 Shields RK, Nguyen MH, Du C, Press E, Cheng S, Clancy CJ. Paradoxical effect of caspofungin



416 against *Candida* bloodstream isolates is mediated by multiple pathways but eliminated in human serum.  
417 Antimicrob Agents Chemother 2011;55(6):2641-7.  
418 Siles SA, Srinivasan A, Pierce CG, Lopez-Ribot JL, Ramasubramanian AK. High-throughput screening  
419 of a collection of known pharmacologically active small compounds for identification of *Candida*  
420 *albicans* biofilm inhibitors. Antimicrob Agents Chemother 2013;57(8):3681-7.  
421 Singh S, Fatima Z, Ahmad K, Hameed S. Fungicidal action of geraniol against *Candida albicans* is  
422 potentiated by abrogated CaCdr1p drug efflux and fluconazole synergism. PLoS One  
423 2018;13(8):e0203079.  
424 Stojanovic-Radic Z, Comic L, Radulovic N, Blagojevic P, Denic M, Miltojevic A, Rajkovic J,  
425 Mihajilov-Krstev T. Antistaphylococcal activity of *Inula helenium* L. root essential oil: eudesmane  
426 sesquiterpene lactones induce cell membrane damage. Eur J Clin Microbiol Infect Dis  
427 2012;31(6):1015-25.  
428 Sudbery PE. Growth of *Candida albicans* hyphae. Nat Rev Microbiol 2011;9(10):737-48.  
429 Taff HT, Mitchell KF, Edward JA, Andes DR. Mechanisms of *Candida* biofilm drug resistance. Future  
430 Microbiol 2013;8(10):1325-37.  
431 Thangamani S, Eldesouky HE, Mohammad H, Pascuzzi PE, Avramova L, Hazbun TR, Seleem MN.  
432 Ebselen exerts antifungal activity by regulating glutathione (GSH) and reactive oxygen species (ROS)  
433 production in fungal cells. Biochim Biophys Acta Gen Subj 2017;1861(1 Pt A):3002-3010.  
434 Venkatesh M, Rong L, Raad I, Versalovic J. Novel synergistic antibiofilm combinations for salvage of  
435 infected catheters. J Med Microbiol 2009;58(Pt 7):936-44.  
436 Vila TV, Ishida K, de Souza W, Prousis K, Calogeropoulou T, Rozental S. Effect of alkylphospholipids  
437 on *Candida albicans* biofilm formation and maturation. J Antimicrob Chemother 2013;68(1):113-25.  
438 Wahab S, Lal B, Jacob Z, Pandey VC, Srivastava OP. Studies on a strain of *Fusarium solani* (Mart.)  
439 Sacc. Isolated from a case of mycotic keratitis. Mycopathologia 1979;68(1):31-8.  
440 Wall G, Montelongo-Jauregui D, Vidal Bonifacio B, Lopez-Ribot JL, Uppuluri P. *Candida albicans*  
441 biofilm growth and dispersal: contributions to pathogenesis. Curr Opin Microbiol 2019;52:1-6.  
442 Wang X, Lan YL, Xing JS, Lan XQ, Wang LT, Zhang B. Alantolactone plays neuroprotective roles in  
443 traumatic brain injury in rats via anti-inflammatory, anti-oxidative and anti-apoptosis pathways. Am J  
444 Transl Res 2018;10(2):368-380.  
445 Wong SS, Samaranayake LP, Seneviratne CJ. In pursuit of the ideal antifungal agent for *Candida*  
446 infections: high-throughput screening of small molecules. Drug Discov Today 2014;19(11):1721-30.  
447 Wright GD. Antibiotic Adjuvants: Rescuing Antibiotics from Resistance. Trends Microbiol  
448 2016;24(11):862-871.  
449 Yang C, Yang J, Sun M, Yan J, Meng X, Ma T. Alantolactone inhibits growth of K562/adriamycin cells  
450 by downregulating Bcr/Abl and P-glycoprotein expression. IUBMB Life 2013;65(5):435-44.  
451 Yang L, Liu X, Zhuang X, Feng X, Zhong L, Ma T. Antifungal Effects of Saponin Extract from  
452 Rhizomes of *Dioscorea panthaica* Prain et Burk against *Candida albicans*. Evidence-Based  
453 Complementary and Alternative Medicine 2018a;2018:1-13.  
454 Yang L, Liu X, Zhong L, Sui Y, Quan G, Huang Y, Wang F, Ma T. Dioscin Inhibits Virulence Factors of  
455 *Candida albicans*. BioMed Research International 2018b;2018:1-9.  
456 Yang LF, Liu X, Lv LL, Ma ZM, Feng XC, Ma TH. Dracorhodin perchlorate inhibits biofilm formation  
457 and virulence factors of *Candida albicans*. J Mycol Med 2018c;28(1):36-44.  
458 Zong M-R, Zhao Y-H, Zhang K, Yang L-F, Zheng Y-C, He C-Y. Inhibitory effects of natural compound  
459 alantolactone on human non-small cell lung cancer A549 cells. Chemical Research in Chinese



460 Universities 2011;27(2):241-244.

461
